# Supplementary material for: Conservation of core complex subunits shaped the structure and function of photosystem I in the secondary endosymbiont alga Nannochloropsis gaditana
Source: PubMed Central journal article supplement (PMC5216901; doi:10.1111/nph.14156), 2016-09-13
Supplement: NPH-213-714-s001.pdf [file NPH-213-714-s001.pdf]

# Conservation of core complex subunits shaped the structure and function of photosystem I in the secondary endosymbiont alga *Nannochloropsis gaditana*

Alessandro Alboresi, Clotilde Le Quiniou, Sathish K. N. Yadav, Martin Scholz, Andrea Meneghesso, Caterina Gerotto, Diana Simionato, Michael Hippler, Egbert J. Boekema, Roberta Croce and Tomas Morosinotto

Article acceptance date: 13 July 2016

## SUPPLEMENTARY MATERIAL

**FIGURE S1. Quantification of P700 content in PSI-LHC isolated from *Nannochloropsis gaditana*.** The  $\Delta OD_{705}$  signal measured with a JTS10 spectrophotometer (Biologic, France) was used as a quantification of the total P700 amount present in the sample after normalization to the precise Chl content of each sample ( $\approx 10 \mu\text{g}$  of Chl). To obtain the maximal P700 oxidation, P700 of isolated PSI-LHC was fully reduced by incubating the samples in the dark for 5 minutes with  $375 \mu\text{M}$  Methylviologen and  $2 \text{mM}$  Ascorbate. After incubation, the sample was illuminated with an actinic red light ( $630 \text{nm}$ ). A) Signal from PSI-LHC $_{\alpha}$  (black squares) and PSI-LHC $_{\beta}$  (red circles) depending on the actinic light intensity ( $n = 3$ ). B) Average over the different light intensities ( $150\text{-}2050 \mu\text{mol photons m}^{-2} \text{s}^{-1}$ ). The average values are not statistically different ( $n = 12$ ). Error bars represent the standard deviation.

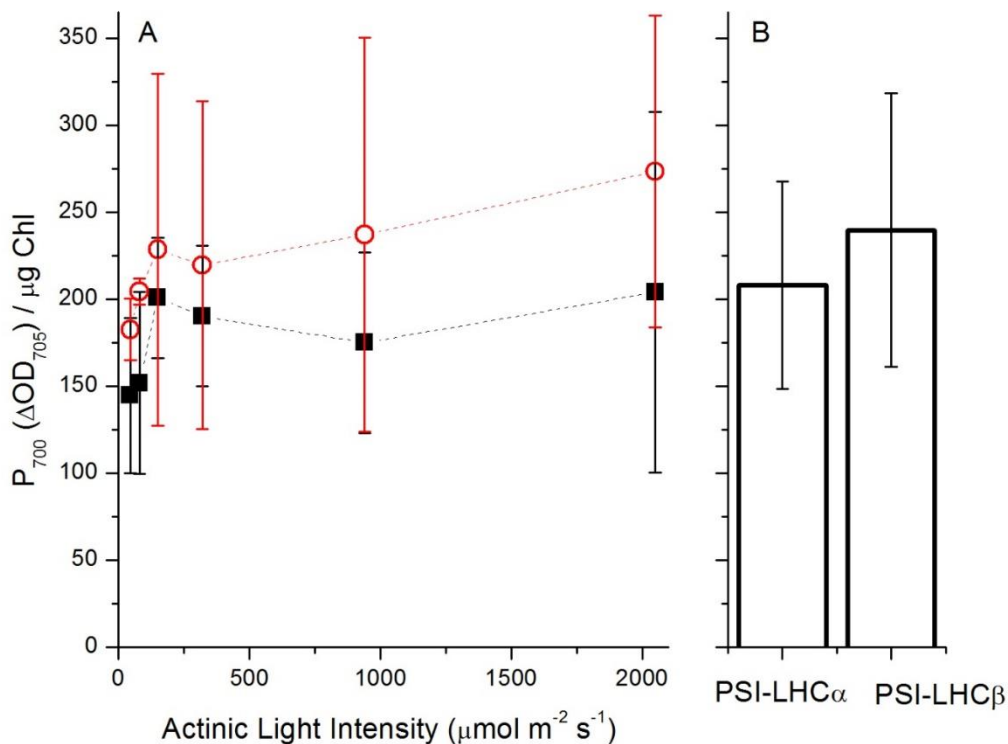

**Figure S2. Protein distribution in the different fractions collected from a sucrose gradient loaded with thylakoids of *N. gaditana* solubilized with  $\alpha$ -DM.** Only LHC subunits not specifically enriched in PSI fraction are reported here, divided in LHCF (A), LHCR (B) and LHCX and LHC-like (C). The sucrose density gradient fractions F2-F5 corresponds to LHC monomers, LHC oligomers, PSII core and PSI-LHC, as reported in Figure 3A.

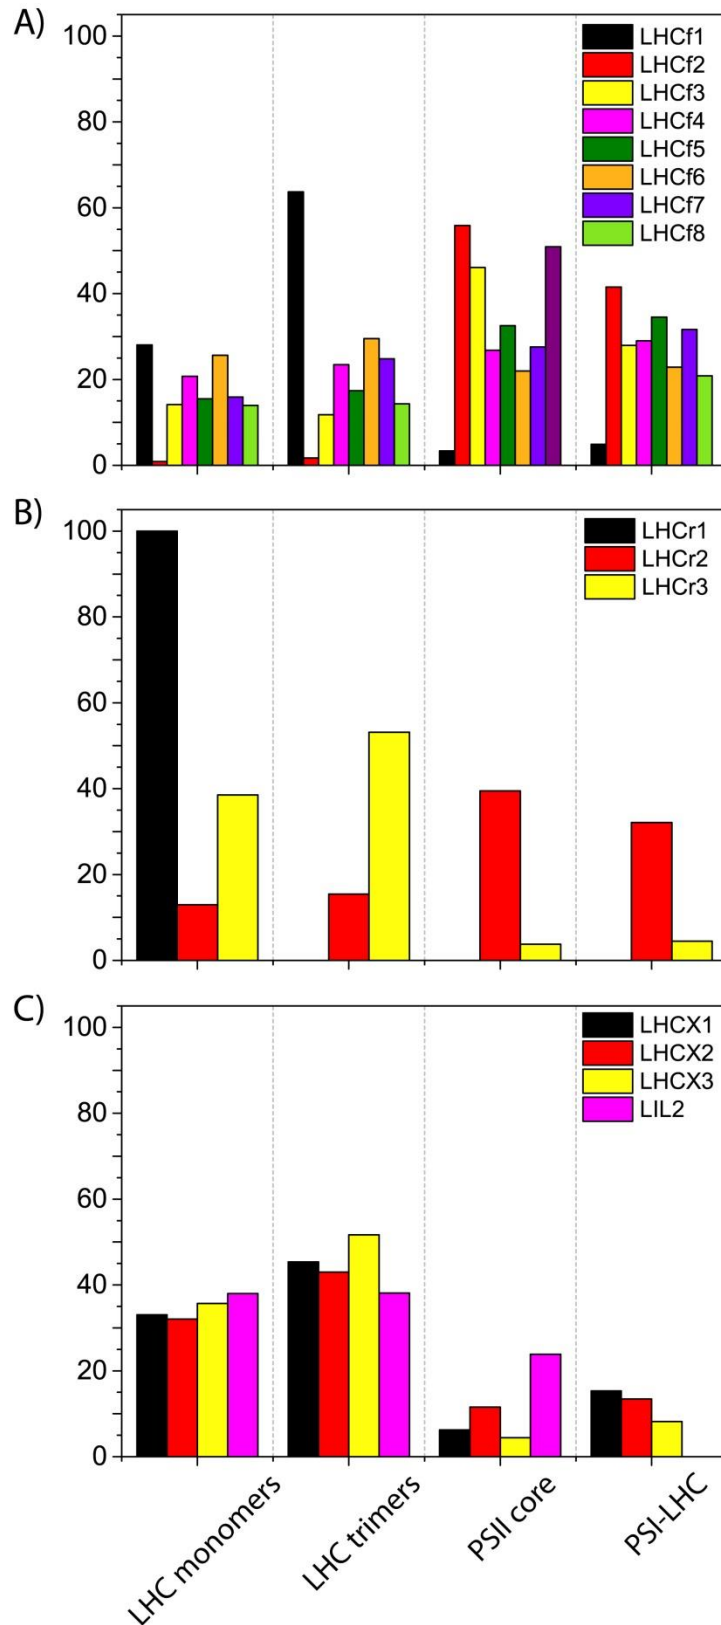

**FIGURE S3. Spectroscopic characterization of *N. gaditana* PSI-LHC at room temperature.** Absorption spectra (A) of PSI-LHC $_{\alpha}$  (black) and PSI-LHC $_{\beta}$  (red), normalized to the maximum in the Q $_y$  region, and their second derivative (B). Fluorescence emission spectra upon 400 nm excitation (narrow line) or 500 nm excitation (thick line) of PSI-LHC $_{\alpha}$  (C) and PSI-LHC $_{\beta}$  (D). Spectra are normalized to the maximum emission.

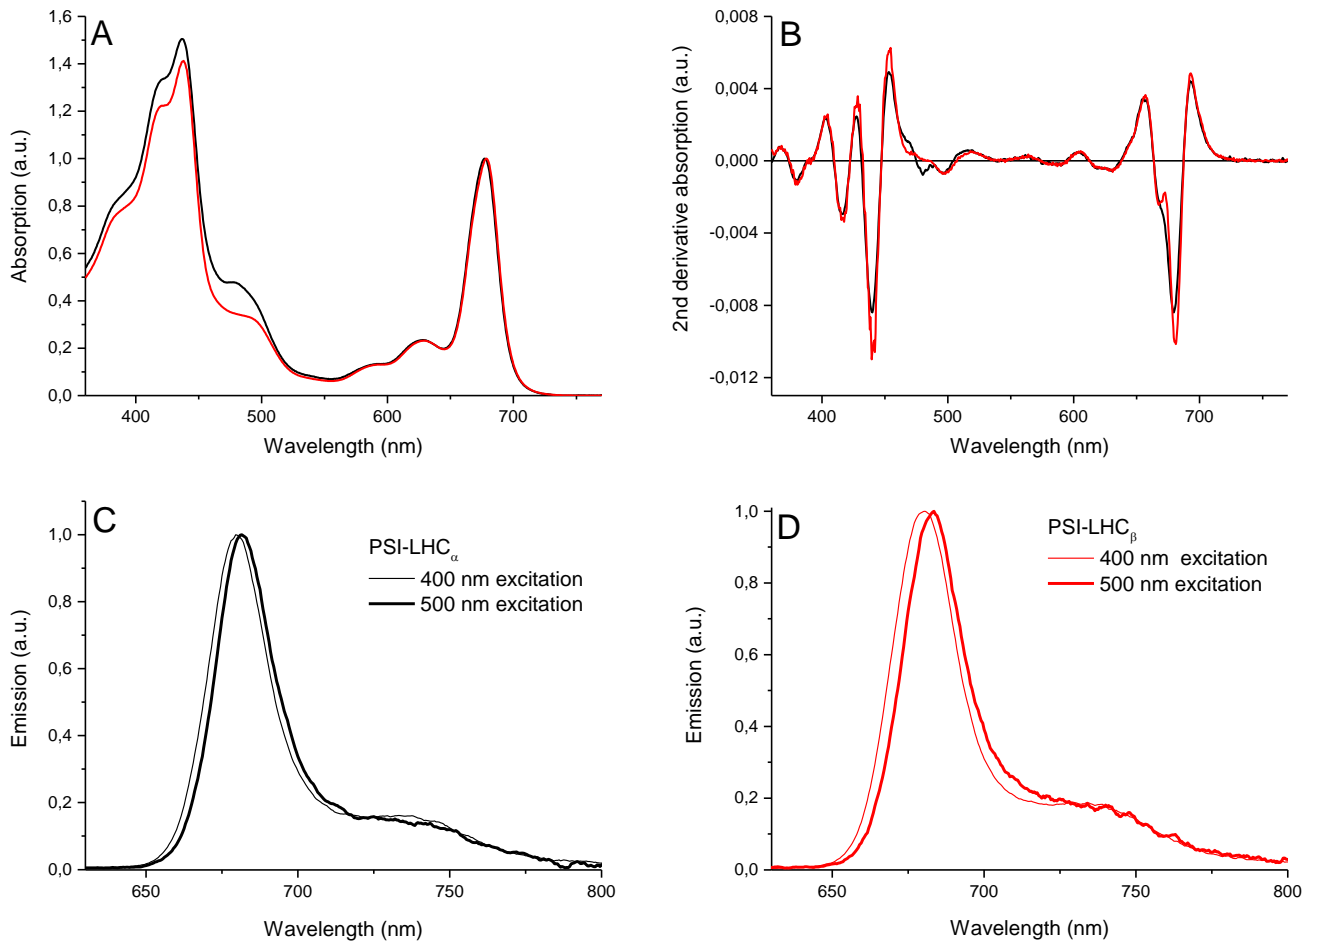

**Table S1.** NCBI Sequences AC numbers of identified PSI core subunits. \* indicates that more than one isoform has been identified in the genome (Jensen *et al.*, 2007; Busch *et al.*, 2013). ND stands for not determined sequence.

|                          | <i>subunit</i> | <i>A. thaliana</i>         | <i>O. sativa</i>   | <i>P. patens</i>      | <i>C. reinhardtii</i> | <i>Galdieria sulphuraria</i> | <i>Cyanidioschyzon merolae</i> | <i>Phaeodactylum tricornutum</i> | <i>Thalassiosira pseudonana</i> | <i>Ectocarpus siliculosus</i> | <i>Nannochloropsis gaditana</i>       | <i>Emiliania huxleyi</i> |
|--------------------------|----------------|----------------------------|--------------------|-----------------------|-----------------------|------------------------------|--------------------------------|----------------------------------|---------------------------------|-------------------------------|---------------------------------------|--------------------------|
| Present in cyanobacteria | <b>PsaA</b>    | NP_0510<br>59.1            | NP_0393<br>83.1    | NP_9042<br>02.1       | NP_9583<br>75.1       | ADO3296<br>5.1               | NP_8490<br>44.1                | YP_87435<br>9.1                  | YP_87449<br>0.1                 | YP_00328<br>9256.1            | YP_00731<br>6990.1                    | YP_27731<br>1.1          |
|                          | <b>PsaB</b>    | NP_0510<br>58.1            | NP_0393<br>82.1    | NP_9042<br>03.1       | NP_9584<br>04.1       | XP_00570<br>5021.1           | NP_8490<br>45.1                | YP_87435<br>8.1                  | YP_87449<br>1.1                 | YP_00328<br>9257.1            | YP_00731<br>6991.1,                   | YP_27731<br>2.1          |
|                          | <b>PsaC</b>    | NP_0511<br>10.1            | NP_0394<br>45.1    | NP_9042<br>39.1       | NP_9584<br>23.1       | ADO3296<br>7.1               | NP_8489<br>82.1                | YP_87448<br>7.1                  | YP_87457<br>6.1                 | YP_00328<br>9280.1            | YP_00731<br>7105.1;<br>AGI98658<br>.1 | YP_27734<br>6.1          |
|                          | <b>PsaD</b>    | NP_1921<br>86.1 (D1);<br>* | NP_0010<br>62511.1 | XP_00175<br>1403.1; * | XP_00169<br>7722.1    | XP_00570<br>5023.1           | NP_8490<br>51.1                | YP_87439<br>4.1                  | YP_87454<br>7.1                 | YP_00328<br>9238.1            | YP_00731<br>7065.1                    | YP_27739<br>8.1          |
|                          | <b>PsaE</b>    | NP_5678<br>18.2 (Ea);<br>* | BAC8408<br>8.1     | XP_00176<br>8221.1; * | XP_00170<br>2611.1    | ADO3296<br>9.2               | NP_8490<br>39.1                | YP_87442<br>8.1                  | XP_00229<br>7543.1; *           | YP_00328<br>9176.1            | YP_00731<br>7004.1                    | XP_00578<br>4629.1; *    |
|                          | <b>PsaF</b>    | NP_1744<br>18.1            | AAC7810<br>6.1     | XP_00178<br>2922.1; * | XP_00169<br>6798.1    | XP_00570<br>5045.1           | NP_8491<br>04.1                | YP_87436<br>1.1                  | YP_87456<br>2.1                 | YP_00328<br>9261.1            | YP_00731<br>7046.1                    | YP_27734<br>8.1          |
|                          | <b>PsaI</b>    | NP_0510<br>69.1            | NP_0393<br>95.1    | NP_9041<br>92.1       | XP_00170<br>3367.1    | ADO3297<br>1.1               | NP_8491<br>27.1                | YP_87437<br>8.1                  | YP_87454<br>1.1                 | YP_00328<br>9284.1            | AGI98707<br>.1                        | YP_27739<br>4.1          |
|                          | <b>PsaJ</b>    | NP_0510<br>79.1            | NP_0394<br>06.1    | NP_9041<br>80.1       | NP_9584<br>17.1       | ADO3297<br>2.1               | NP_8491<br>05.1                | YP_87436<br>0.1                  | YP_87456<br>3.1                 | YP_00328<br>9262.1            | YP_00731<br>7104.1                    | YP_27734<br>9.1          |
|                          | <b>PsaK</b>    | NP_1743<br>27.1            | NP_0010<br>58895.1 | XP_00175<br>2725.1; * | XP_00169<br>7230.1    | ADO3297<br>3.1;<br>P31567.1  | NP_8489<br>78.1                | ND                               | ND                              | ND                            | ND                                    | ND                       |
|                          | <b>PsaL</b>    | NP_1930<br>16.1            | NP_0010<br>66659.1 | XP_00175<br>4840.1    | XP_00169<br>1084.1    | ADO3297<br>4.1               | NP_8491<br>35.1                | YP_87436<br>6.1                  | YP_87455<br>7.1                 | YP_00328<br>9277.1            | YP_00731<br>7052.1                    | YP_27735<br>2.1          |
| <b>PsaM</b>              | ND             | ND                         | NP_9042<br>14.1    | ND                    | ADO3297<br>5.1        | NP_8489<br>56.1              | YP_87438<br>9.1                | YP_87453<br>3.1                  | YP_00328<br>9254.1              | ND                            | YP_27739<br>6.1                       |                          |
| Only eukariotic          | <b>PsaG</b>    | NP_1759<br>63.1            | NP_0010<br>63493.1 | XP_00176<br>5720.1; * | P14224.1              | ND                           | ND                             | ND                               | ND                              | ND                            | ND                                    | ND                       |
|                          | <b>PsaH</b>    | NP_1882<br>35.1 (H1);<br>* | NP_0010<br>56304.1 | XP_00176<br>6961.1; * | XP_00169<br>0629.1    | ND                           | ND                             | ND                               | ND                              | ND                            | ND                                    | ND                       |
|                          | <b>PsaN</b>    | AT5G640<br>40              | EEC68974<br>.1     | Nd                    | AAK0677<br>4.1        | ND                           | ND                             | ND                               | ND                              | ND                            | ND                                    | ND                       |
|                          | <b>PsaO</b>    | NP_5638<br>15.1            | NP_0010<br>52755.1 | XP_00177<br>8960.1; * | XP_00170<br>0109.1    | XP_00570<br>4648.1           | XP_00553<br>7773.1             | ND                               | ND                              | ND                            | ND                                    | ND                       |
|                          | <b>PsaP</b>    | AT2G468<br>20;             | ND                 | ND                    | ND                    | ND                           | ND                             | ND                               | ND                              | ND                            | ND                                    | ND                       |

**Table S2.** Identity matrix for PsaA protein obtained with MUSCLE tool (EMBL-EBI). Conservation versus *A. thaliana* and *N. gaditana* are highlighted in green and yellow, respectively.

| PsaA                             | <i>Emiliana huxleyi</i> | <i>Nannochloropsis gaditana</i> | <i>Ectocarpus siliculosus</i> | <i>Thalassiosira pseudonana</i> | <i>Phaeodactylum tricornutum</i> | <i>P. patens</i> | <i>A. thaliana</i> | <i>O. sativa</i> | <i>C. reinhardtii</i> | <i>Cyanidioschyzon merolae</i> | <i>Galdieria sulphuraria</i> |
|----------------------------------|-------------------------|---------------------------------|-------------------------------|---------------------------------|----------------------------------|------------------|--------------------|------------------|-----------------------|--------------------------------|------------------------------|
| <i>Emiliana huxleyi</i>          | 100                     | 82.95                           | 84.25                         | 85.77                           | 85.11                            | 83.31            | 80.24              | 79.71            | 82.42                 | 82.75                          | 81.52                        |
| <i>Nannochloropsis gaditana</i>  | 82.95                   | 100                             | 85.91                         | 85.5                            | 83.76                            | 82.68            | 79.6               | 78.52            | 82.39                 | 83.06                          | 83.09                        |
| <i>Ectocarpus siliculosus</i>    | 84.25                   | 85.91                           | 100                           | 85.98                           | 85.45                            | 82.44            | 79.22              | 78.42            | 82.89                 | 82.68                          | 81.98                        |
| <i>Thalassiosira pseudonana</i>  | 85.77                   | 85.5                            | 85.98                         | 100                             | 95.48                            | 82.78            | 79.71              | 78.5             | 82.16                 | 81.82                          | 82.31                        |
| <i>Phaeodactylum tricornutum</i> | 85.11                   | 83.76                           | 85.45                         | 95.48                           | 100                              | 82.11            | 79.04              | 77.84            | 81.62                 | 80.48                          | 81.12                        |
| <i>P. patens</i>                 | 83.31                   | 82.68                           | 82.44                         | 82.78                           | 82.11                            | 100              | 92.67              | 90.67            | 89.71                 | 84.89                          | 84.25                        |
| <i>A. thaliana</i>               | 80.24                   | 79.6                            | 79.22                         | 79.71                           | 79.04                            | 92.67            | 100                | 95.47            | 86.36                 | 82.49                          | 81.31                        |
| <i>O. sativa</i>                 | 79.71                   | 78.52                           | 78.42                         | 78.5                            | 77.84                            | 90.67            | 95.47              | 100              | 85.03                 | 80.75                          | 80.51                        |
| <i>C. reinhardtii</i>            | 82.42                   | 82.39                           | 82.89                         | 82.16                           | 81.62                            | 89.71            | 86.36              | 85.03            | 100                   | 85.41                          | 84.42                        |
| <i>Cyanidioschyzon merolae</i>   | 82.75                   | 83.06                           | 82.68                         | 81.82                           | 80.48                            | 84.89            | 82.49              | 80.75            | 85.41                 | 100                            | 87.3                         |
| <i>Galdieria sulphuraria</i>     | 81.52                   | 83.09                           | 81.98                         | 82.31                           | 81.12                            | 84.25            | 81.31              | 80.51            | 84.42                 | 87.3                           | 100                          |

**Table S3. LHC proteins correspondence between *N. gaditana* and *N. oceanica*.** The UniProt ID allowed the identification of the corresponding *N. oceanica* Gene ID. Proposed names of *N. oceanica* CCMP1779 are also reported (Litvín *et al.*, 2016). \* indicates proposed attribution to PSI.

|          | <i>N. gaditana</i> | Gene ID        | UniProt ID | <i>N. oceanica</i> CCMP1779 |
|----------|--------------------|----------------|------------|-----------------------------|
| LHCf     | NgLHCf1            | Naga_100012g50 | W7T4V5     | LHCv2                       |
|          | NgLHCf2            | Naga_100005g99 | W7TY83     | LHCv9                       |
|          | NgLHCf3            | Naga_100157g5  | K8Z8N4     | LHCv5                       |
|          | NgLHCf4            | Naga_100168g14 | W7TFG9     | LHCv7                       |
|          | NgLHCf5            | Naga_100017g59 | W7TRI0     | LHCv4                       |
|          | NgLHCf6            | Naga_100004g86 | W7TXE6     | LHCv8                       |
|          | NgLHCf7            | Naga_100013g28 | W7U405     | LHCv3                       |
|          | NgLHCf8            | Naga_100027g19 | W7TCK1     | LHCv6                       |
| LHCr     | NgLHCr1            | Naga_100002g18 | K8YRV9     | LHCr5                       |
|          | NgLHCr2            | Naga_100168g13 | W7TZB5     | LHCr7                       |
|          | NgLHCr3            | Naga_100018g45 | K8ZB38     | LHCr6                       |
|          | NgLHCr4*           | Naga_100056g15 | W7TJ16     | LHCr1*                      |
|          | NgLHCr5*           | Naga_100092g17 | W7TX20     | LHCr3*                      |
|          | NgLHCr6*           | Naga_100434g4  | W7TJ16     | LHCr4*                      |
|          | NgLHCr7*           | Naga_100641g3  | W7T8I0     | LHCr2                       |
|          | NgLHCr8*           | Naga_100017g83 | W7UAI7     | LHCr11                      |
| LHCx     | NgLHCx1            | Naga_100173g12 | K8YWB4     | LHCx1                       |
|          | NgLHCx2            | Naga_100056g42 | K8YZX9     | LHCx4                       |
|          | NgLHCx3            | Naga_101036g3  | W7TIB0     | LHCx3                       |
| LHC-like | LHC-like – LIL1*   | Naga_100030g5  | W7TTN9     | Red-CAP1*                   |
|          | LHC-like – LIL2    | Naga_101227g1  | W7TI84     | LHCv10                      |
|          |                    |                |            | LHCv1                       |
|          |                    |                |            | LHCx2*                      |

**Table S4.** Maximum absorption of PSI-LHC $_{\alpha}$  and PSI-LHC $_{\beta}$  in the Q $_y$  and absorption forms visible in the second derivative of the absorption spectra, at 77K and RT.

|                     | Maximum absorption in the Q $_y$ |       | 2nd Derivative in the Chls region |              | 2nd Derivative in the Car region |            |
|---------------------|----------------------------------|-------|-----------------------------------|--------------|----------------------------------|------------|
|                     | 77K                              | RT    | 77K                               | RT           | 77K                              | RT         |
| PSI-LHC $_{\alpha}$ | 677.5                            | 677   | 669, 679.5, 685, 697.5            | 668.5, 679.5 | 486.5, 503                       | 480, 497   |
| PSI-LHC $_{\beta}$  | 678.5                            | 678.5 | 669, 679.5, 685, 697.5            | 667.5, 680.5 | 486.5, 503                       | 479.5, 497 |

#### REFERENCE LIST

**Busch A, Petersen J, Webber-Birungi MT, Powikrowska M, Lassen LMM, Naumann-Busch B, Nielsen AZ, Ye J, Boekema EJ, Jensen ON, et al. 2013.** Composition and structure of photosystem I in the moss *Physcomitrella patens*. *Journal of experimental botany* **64**: 2689–99.

**Jensen PE, Bassi R, Boekema EJ, Dekker JP, Jansson S, Leister D, Robinson C, Scheller HV. 2007.** Structure, function and regulation of plant photosystem I. *Biochimica et biophysica acta* **1767**: 335–52.

**Litvín R, Bína D, Herbstová M, Gardian Z. 2016.** Architecture of the light-harvesting apparatus of the eustigmatophyte alga *Nannochloropsis oceanica*. *Photosynthesis research*. DOI: 10.1007/s11120-016-0234-1.
